# Supplementary material for: Hybrid Mice as Genetic Models of High Alcohol Consumption
Source: Springer Nature journal article supplement (doi:10.1007/s10519-009-9298-4), 2009-10-01
Supplement: MOESM6 [file 10519_2009_9298_MOESM6_ESM.xls]

## Sheet: Inbred Strains
SUPPLEMENTAL TABLE VI.
two-way ANOVA posthoc analyses of data (trial comparison ONLY for inbred strains) presented in Figure 3,4,5,6.
Statistically significant results shown in black bold font.
Statistically significant differences between trials for the same concentration of ethanol shown in red bold font.
Strain	B6
Behavior	EtOH (g/kg)
Trial	Concentrations
1st	0.09		1	1	1.16092e-08	0.198716	1	2.28155e-09	0.0100855	0.0154884
1st	0.18	1		1	6.14675e-07	1	1	1.20575e-07	0.230307	0.330121
1st	0.27	1	1		5.7477e-08	0.602465	1	1.12461e-08	0.0378487	0.056695
2nd	0.09	1.16092e-08	6.14675e-07	5.7477e-08		0.000548785	2.69371e-07	1	0.0153129	0.00996928
2nd	0.18	0.198716	1	0.602465	0.000548785		1	0.000118762	1	1
2nd	0.27	1	1	1	2.69371e-07	1		5.27208e-08	0.12557	0.182949
3d	0.09	2.28155e-09	1.20575e-07	1.12461e-08	1	0.000118762	5.27208e-08		0.00377515	0.00240572
3d	0.18	0.0100855	0.230307	0.0378487	0.0153129	1	0.12557	0.00377515		1
3d	0.27	0.0154884	0.330121	0.056695	0.00996928	1	0.182949	0.00240572	1
Behavior	Preference
Trial	Concentrations
1st	0.09		0	0	3.05356e-12	0	0	8.56035e-11	0	0
1st	0.18	0		2.76846e-05	5.86686e-06	1	7.67673e-05	1.92518e-07	1	5.37898e-06
1st	0.27	0	2.76846e-05		7.99361e-15	0.000374103	1	0	0.000127155	1
2nd	0.09	3.05356e-12	5.86686e-06	7.99361e-15		3.89485e-07	1.9984e-14	1	1.22006e-06	0
2nd	0.18	0	1	0.000374103	3.89485e-07		0.000992945	1.24995e-08	1	7.67673e-05
2nd	0.27	0	7.67673e-05	1	1.9984e-14	0.000992945		0	0.000344562	1
3d	0.09	8.56035e-11	1.92518e-07	0	1	1.24995e-08	0		3.93423e-08	0
3d	0.18	0	1	0.000127155	1.22006e-06	1	0.000344562	3.93423e-08		2.54142e-05
3d	0.27	0	5.37898e-06	1	0	7.67673e-05	1	0	2.54142e-05
Behavior	Fluid Intake (g/kg)
Trial	Concentrations
1st	0.09		1	1	1	1	1	0.517118	0.000505519	0.137533
1st	0.18	1		1	1	0.0226197	0.420438	0.00244561	7.20418e-07	0.000445402
1st	0.27	1	1		1	0.43853	1	0.0658817	3.43226e-05	0.0144973
2nd	0.09	1	1	1		0.583043	1	0.091399	5.16832e-05	0.0206323
2nd	0.18	1	0.0226197	0.43853	0.583043		1	1	0.183881	1
2nd	0.27	1	0.420438	1	1	1		1	0.00846986	1
3d	0.09	0.517118	0.00244561	0.0658817	0.091399	1	1		1	1
3d	0.18	0.000505519	7.20418e-07	3.43226e-05	5.16832e-05	0.183881	0.00846986	1		1
3d	0.27	0.137533	0.000445402	0.0144973	0.0206323	1	1	1	1
Strain	FVB
Behavior	EtOH (g/kg)
Trial	Concentrations
1st	0.09		1	6.12164e-05	0.000182052	1.83354e-06	5.88772e-09	0.000550945	1.00962e-05	3.67374e-06
1st	0.18	1		0.0310327	0.0854084	0.000951175	2.00057e-06	0.228704	0.00537761	0.00194088
1st	0.27	6.12164e-05	0.0310327		1	1	0.0722464	1	1	1
2nd	0.09	0.000182052	0.0854084	1		1	0.0260949	1	1	1
2nd	0.18	1.83354e-06	0.000951175	1	1		1	1	1	1
2nd	0.27	5.88772e-09	2.00057e-06	0.0722464	0.0260949	1		0.00900724	0.359366	0.835411
3d	0.09	0.000550945	0.228704	1	1	1	0.00900724		1	1
3d	0.18	1.00962e-05	0.00537761	1	1	1	0.359366	1		1
3d	0.27	3.67374e-06	0.00194088	1	1	1	0.835411	1	1
Behavior	Preference
Trial	Concentrations
1st	0.09		1	1	1.9897e-07	0.00427293	0.110521	1.01354e-05	0.0173848	1
1st	0.18	1		1	1.96042e-06	0.0432376	0.850391	0.000110457	0.160922	1
1st	0.27	1	1		1.36312e-05	0.258117	1	0.000803744	0.850391	1
2nd	0.09	1.9897e-07	1.96042e-06	1.36312e-05		0.0511497	0.00185883	1	0.0130187	2.47115e-05
2nd	0.18	0.00427293	0.0432376	0.258117	0.0511497		1	1	1	0.429649
2nd	0.27	0.110521	0.850391	1	0.00185883	1		0.0938921	1	1
3d	0.09	1.01354e-05	0.000110457	0.000803744	1	1	0.0938921		0.52419	0.00146358
3d	0.18	0.0173848	0.160922	0.850391	0.0130187	1	1	0.52419		1
3d	0.27	1	1	1	2.47115e-05	0.429649	1	0.00146358	1
Behavior	Fluid Intake (g/kg)
Trial	Concentrations
1st	0.09		1	1	1	1	1	0.160074	1	1
1st	0.18	1		1	1	1	1	0.00176678	1	0.0536205
1st	0.27	1	1		1	1	1	0.00861024	1	0.227855
2nd	0.09	1	1	1		1	1	0.338392	1	1
2nd	0.18	1	1	1	1		1	0.00931011	1	0.244279
2nd	0.27	1	1	1	1	1		0.0968725	1	1
3d	0.09	0.160074	0.00176678	0.00861024	0.338392	0.00931011	0.0968725		0.464742	1
3d	0.18	1	1	1	1	1	1	0.464742		1
3d	0.27	1	0.0536205	0.227855	1	0.244279	1	1	1
Strain	BUB
Behavior	EtOH (g/kg)
Trial	Concentrations
1st	0.09		1	1	1	0.600335	0.124719	1	1	1
1st	0.18	1		1	1	1	0.410443	1	1	1
1st	0.27	1	1		0.57824	1	1	0.978254	1	1
2nd	0.09	1	1	0.57824		0.221241	0.0417134	1	1	1
2nd	0.18	0.600335	1	1	0.221241		1	0.389816	0.797082	1
2nd	0.27	0.124719	0.410443	1	0.0417134	1		0.0774034	0.171103	1
3d	0.09	1	1	0.978254	1	0.389816	0.0774034		1	1
3d	0.18	1	1	1	1	0.797082	0.171103	1		1
3d	0.27	1	1	1	1	1	1	1	1
Behavior	Preference
Trial	Concentrations
1st	0.09		1	1	1	1	1	1	1	1
1st	0.18	1		1	1	1	1	1	1	1
1st	0.27	1	1		0.639045	1	1	1	1	1
2nd	0.09	1	1	0.639045		0.184203	0.639045	1	1	1
2nd	0.18	1	1	1	0.184203		1	1	1	1
2nd	0.27	1	1	1	0.639045	1		1	1	1
3d	0.09	1	1	1	1	1	1		1	1
3d	0.18	1	1	1	1	1	1	1		1
3d	0.27	1	1	1	1	1	1	1	1
Behavior	Fluid Intake (g/kg)
Trial	Concentrations
1st	0.09		1	1	0.0439211	0.755324	1	0.0310767	0.00714611	0.0783269
1st	0.18	1		1	1	1	1	1	0.956128	1
1st	0.27	1	1		1	1	1	1	0.593308	1
2nd	0.09	0.0439211	1	1		1	1	1	1	1
2nd	0.18	0.755324	1	1	1		1	1	1	1
2nd	0.27	1	1	1	1	1		1	1	1
3d	0.09	0.0310767	1	1	1	1	1		1	1
3d	0.18	0.00714611	0.956128	0.593308	1	1	1	1		1
3d	0.27	0.0783269	1	1	1	1	1	1	1
Strain	NZB
Behavior	EtOH (g/kg)
Trial	Concentrations
1st	0.09		0.00236698	0.158346	0.110393	1	0.031774	0.000238135	0.00305875	0.0111215
1st	0.18	0.00236698		1	1	0.423448	1	1	1	1
1st	0.27	0.158346	1		1	1	1	0.98284	1	1
2nd	0.09	0.110393	1	1		1	1	1	1	1
2nd	0.18	1	0.423448	1	1		1	0.055396	0.524696	1
2nd	0.27	0.031774	1	1	1	1		1	1	1
3d	0.09	0.000238135	1	0.98284	1	0.055396	1		1	1
3d	0.18	0.00305875	1	1	1	0.524696	1	1		1
3d	0.27	0.0111215	1	1	1	1	1	1	1
Behavior	Preference
Trial	Concentrations
1st	0.09		7.8411e-09	5.91819e-10	1.44077e-06	8.75906e-09	2.85967e-10	1.52911e-08	5.3303e-10	2.1014e-10
1st	0.18	7.8411e-09		1	1	1	1	1	1	1
1st	0.27	5.91819e-10	1		0.199373	1	1	1	1	1
2nd	0.09	1.44077e-06	1	0.199373		1	0.0911077	1	0.178604	0.0645728
2nd	0.18	8.75906e-09	1	1	1		1	1	1	1
2nd	0.27	2.85967e-10	1	1	0.0911077	1		1	1	1
3d	0.09	1.52911e-08	1	1	1	1	1		1	1
3d	0.18	5.3303e-10	1	1	0.178604	1	1	1		1
3d	0.27	2.1014e-10	1	1	0.0645728	1	1	1	1
Behavior	Fluid Intake (g/kg)
Trial	Concentrations
1st	0.09		1	2.78808e-07	9.68495e-08	3.04648e-09	4.28424e-09	6.20911e-09	2.0006e-10	6.29456e-11
1st	0.18	1		1.60216e-06	5.40995e-07	1.53035e-08	2.17622e-08	3.19199e-08	9.16703e-10	2.77094e-10
1st	0.27	2.78808e-07	1.60216e-06		1	1	1	1	0.284617	0.0795739
2nd	0.09	9.68495e-08	5.40995e-07	1		1	1	1	0.728645	0.219048
2nd	0.18	3.04648e-09	1.53035e-08	1	1		1	1	1	1
2nd	0.27	4.28424e-09	2.17622e-08	1	1	1		1	1	1
3d	0.09	6.20911e-09	3.19199e-08	1	1	1	1		1	1
3d	0.18	2.0006e-10	9.16703e-10	0.284617	0.728645	1	1	1		1
3d	0.27	6.29456e-11	2.77094e-10	0.0795739	0.219048	1	1	1	1
Strain	SJL
Behavior	EtOH (g/kg)
Trial	Concentrations
1st	0.09		0.117859	0.0459985	0.010151	0.00580063	0.00392497	0.0105062	0.0742515	0.0813887
1st	0.18	0.117859		1	1	1	1	1	1	1
1st	0.27	0.0459985	1		1	1	1	1	1	1
2nd	0.09	0.010151	1	1		1	1	1	1	1
2nd	0.18	0.00580063	1	1	1		1	1	1	1
2nd	0.27	0.00392497	1	1	1	1		1	1	1
3d	0.09	0.0105062	1	1	1	1	1		1	1
3d	0.18	0.0742515	1	1	1	1	1	1		1
3d	0.27	0.0813887	1	1	1	1	1	1	1
Behavior	Preference
Trial	Concentrations
1st	0.09		0.000433515	8.29986e-05	0.000188704	6.32828e-05	3.69414e-05	0.000475757	0.000498416	0.000130811
1st	0.18	0.000433515		1	1	1	1	1	1	1
1st	0.27	8.29986e-05	1		1	1	1	1	1	1
2nd	0.09	0.000188704	1	1		1	1	1	1	1
2nd	0.18	6.32828e-05	1	1	1		1	1	1	1
2nd	0.27	3.69414e-05	1	1	1	1		1	1	1
3d	0.09	0.000475757	1	1	1	1	1		1	1
3d	0.18	0.000498416	1	1	1	1	1	1		1
3d	0.27	0.000130811	1	1	1	1	1	1	1
Behavior	Fluid Intake (g/kg)
Trial	Concentrations
1st	0.09		1	1	1	1	1	1	1	1
1st	0.18	1		1	1	1	1	1	1	1
1st	0.27	1	1		1	1	1	1	1	1
2nd	0.09	1	1	1		1	1	1	1	1
2nd	0.18	1	1	1	1		1	1	1	1
2nd	0.27	1	1	1	1	1		1	1	1
3d	0.09	1	1	1	1	1	1		1	1
3d	0.18	1	1	1	1	1	1	1		1
3d	0.27	1	1	1	1	1	1	1	1
